# Supplementary material for: The paracaspase MALT1 cleaves the LUBAC subunit HOIL1 during antigen receptor signaling
Source: Oxford University Press journal article supplement (doi:10.1242/jcs.185025), 2016-03-23
Supplement: jcs185025supp.pdf [file jcs185025supp.pdf]

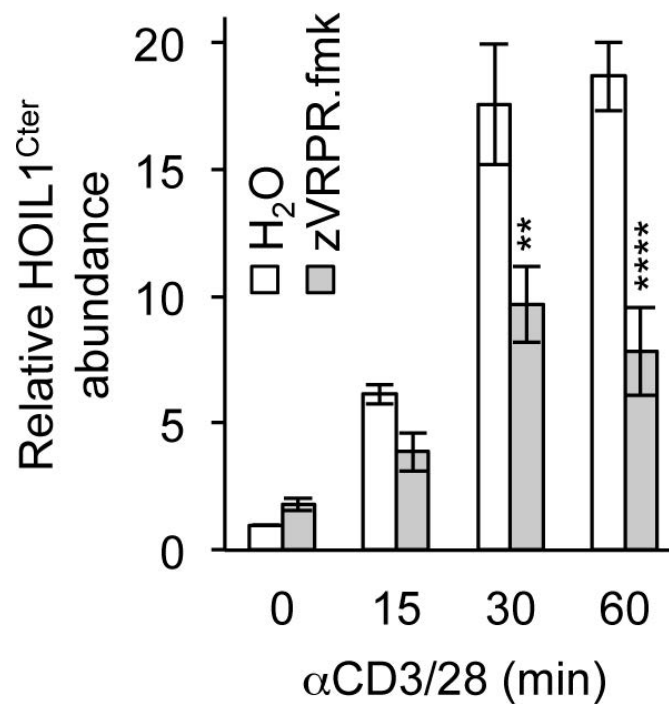

**Figure S1. Impact of MALT1 protease inhibition on HOIL1 proteolysis.** Jurkat T lymphocytes were treated with 75  $\mu$ M zVRPR.fmk or H<sub>2</sub>O for 30 min, prior stimulation with 1  $\mu$ g.ml<sup>-1</sup> anti-CD3 plus anti-CD28 for 0, 15, 30, and 60 min. Cell lysates were prepared and immunoblots (IB) performed to visualize HOIL1 and HOIL1<sup>Ctl</sup> fragment. IB were quantified using GAPDH or tubulin as control. Histograms represent the mean  $\pm$  SEM of three independent experiments(\*\*  $P < 0.01$ ; \*\*\*\*  $P < 0.0001$  by ANOVA).

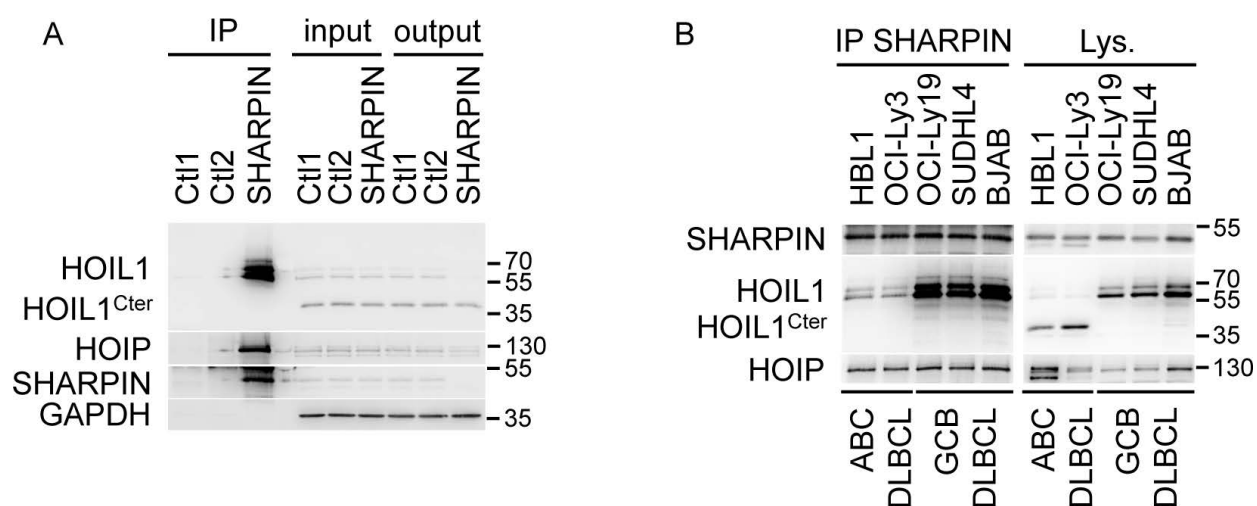

**Figure S2. Impact of HOIL1 cleavage on the LUBAC assembly.** (A) Lysates from ABC DLBCL cells (HBL1) were immunoprecipitated (IP) with two unrelated control antibodies (pEZ2, Ctl1; USP34, Ctl2. All from Bethyl) or with anti-SHARPIN antibodies and immunoblots (IB) were performed as indicated. Cell extracts prior (input) and after (output) IP were also analyzed. (B) Cell lysates from ABC DLBCL and GCB DLBCL cell lines were IP with antibodies to SHARPIN, and IB were performed as indicated. Lys., lysates. Molecular weight markers (kDa) are shown.
